# Supplementary material
Source: publisher site journal article supplement (https://www.dovepress.com/article/supplementary_file/536633/536633%20Supplementary%20materials.docx)
Supplement: Supplementary file 1 [file 536633%20Supplementary%20materials.docx]

**
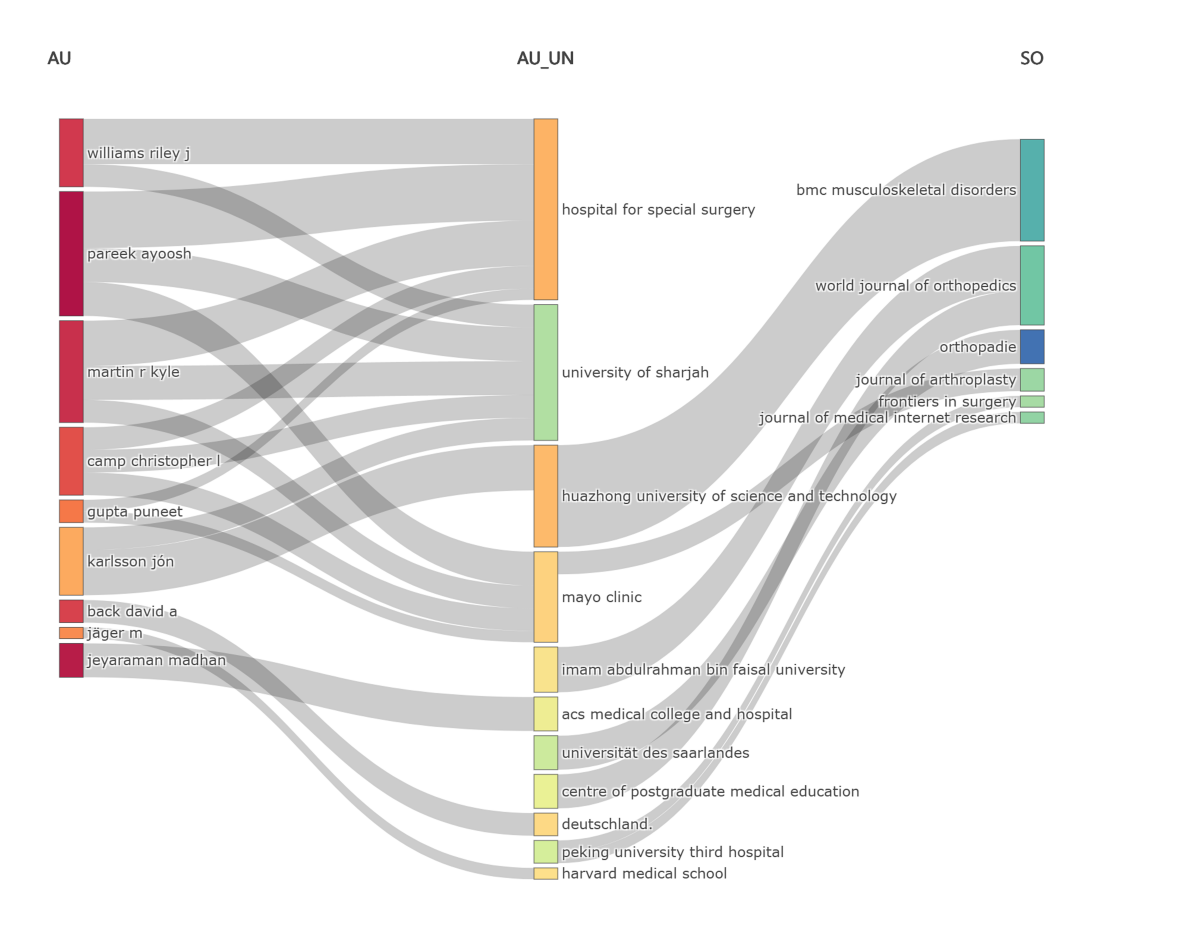
Supplementary Materials**

**Supplementary Fig. S1** From January 2010 to December 2024: Sankey Diagram of Interdisciplinary Literature on AI and Orthopedics (Fields: AU—AU_UN—SO).

**Supplementary**
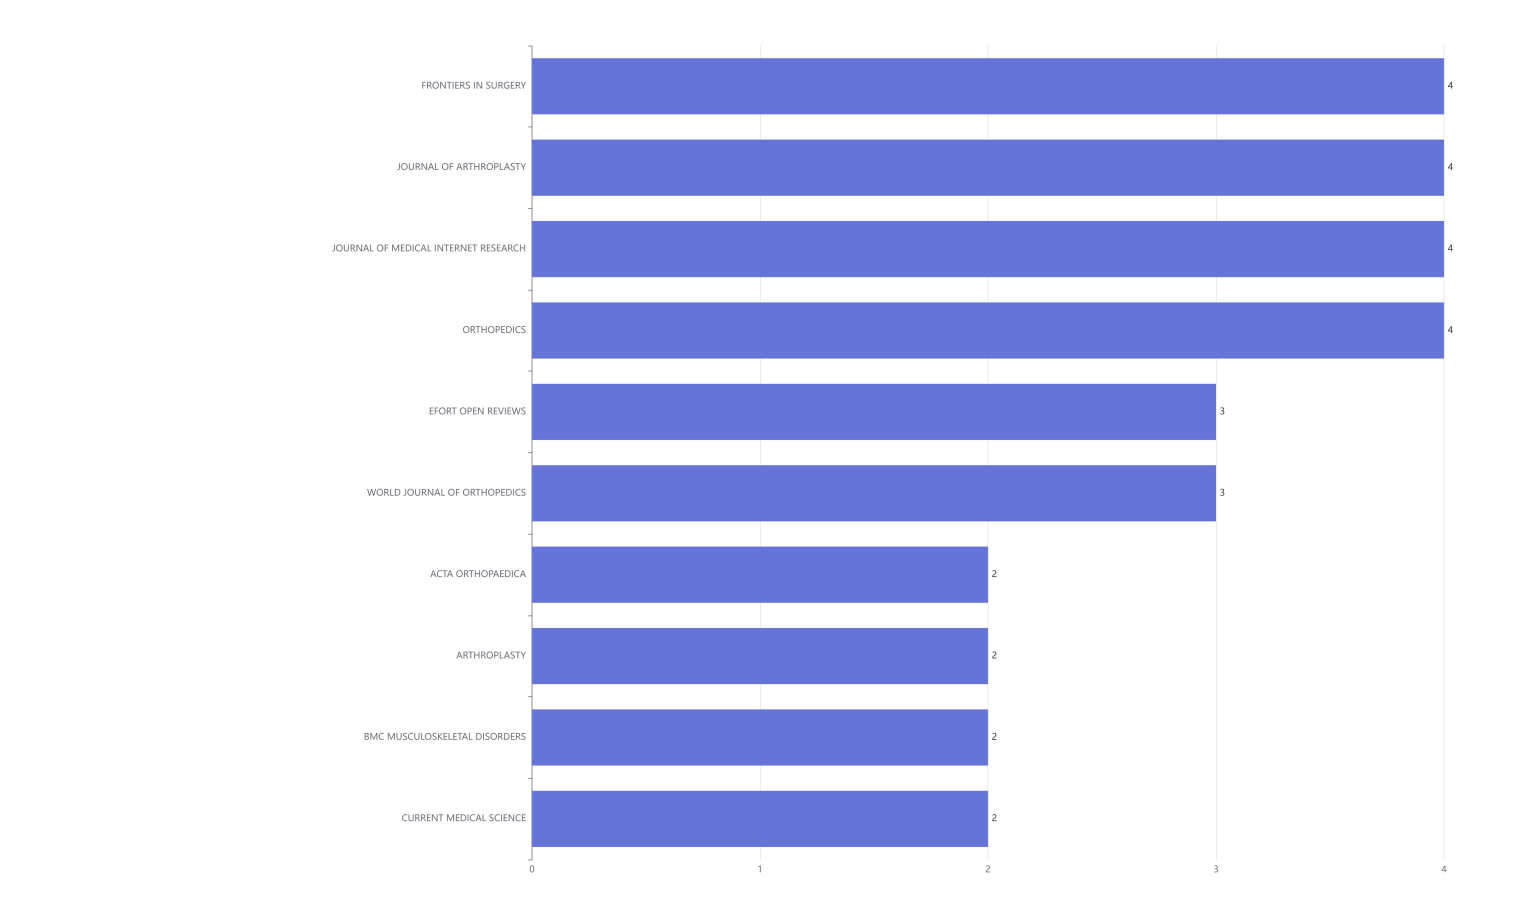
 **Fig. S2** Bar Chart of Literature Sources in the Intersection of AI and Orthopedics from January 2010 to December 2024.

**Supplementary**

 **Fig. S3** The cumulative publication statistics chart for literature in the interdisciplinary field of AI and orthopedics from January 2010 to December 2024, categorized by year of publication.


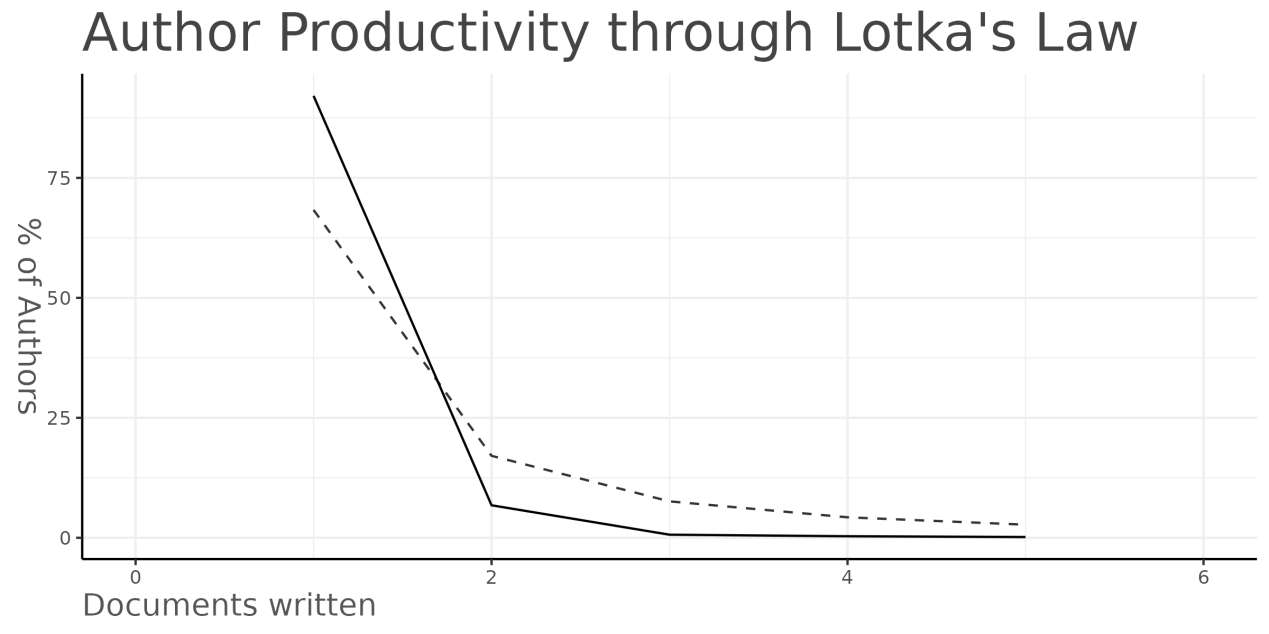


**Supplementary Fig. S4** Evaluation of Author Productivity in the Intersection of AI and Orthopedics from January 2010 to December 2024 Based on Lotka's Law.

**Supplementary**
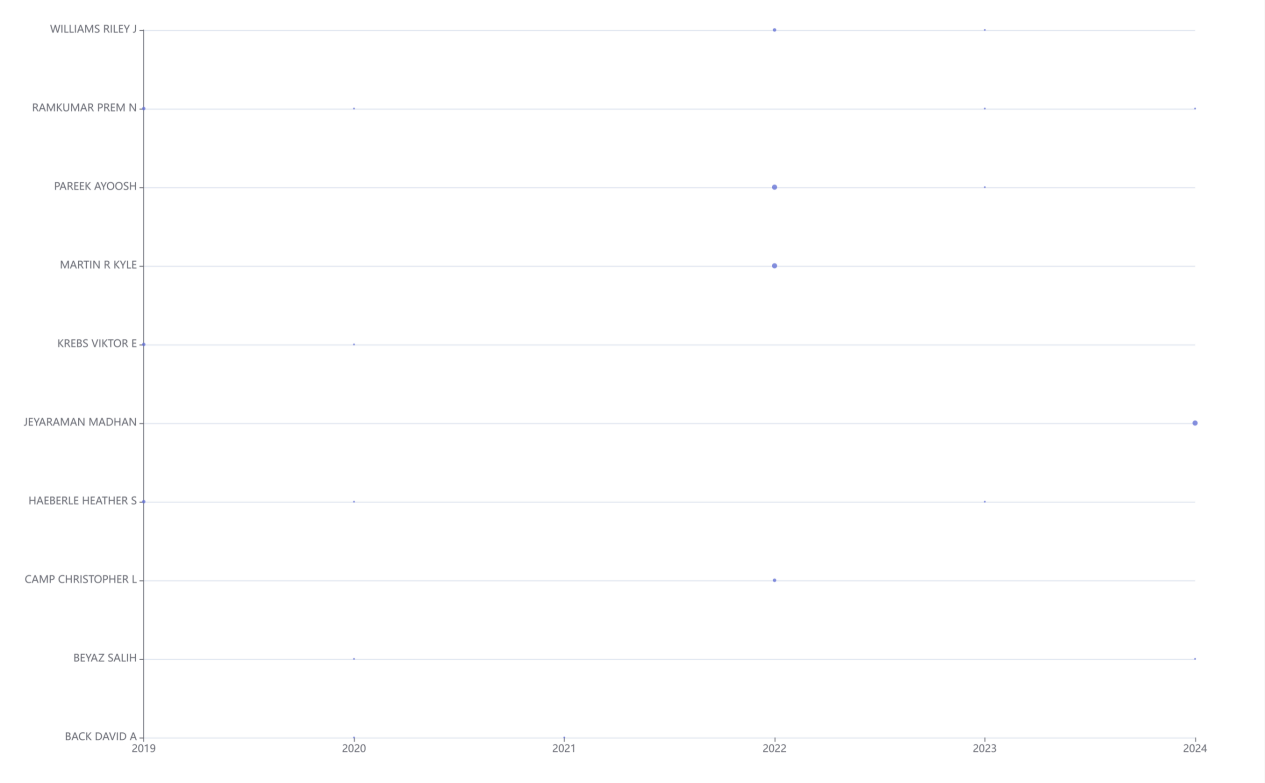
**Fig. S5** Publications by Authors in the Intersection of AI and Orthopedics from January 2010 to December 2024, Categorized by Year.

**Supplementary**

**Fig. S6** Timeline of Research Output from Institutions in the Intersection of AI and Orthopedics, January 2010 to December 2024.

**Supplementary**
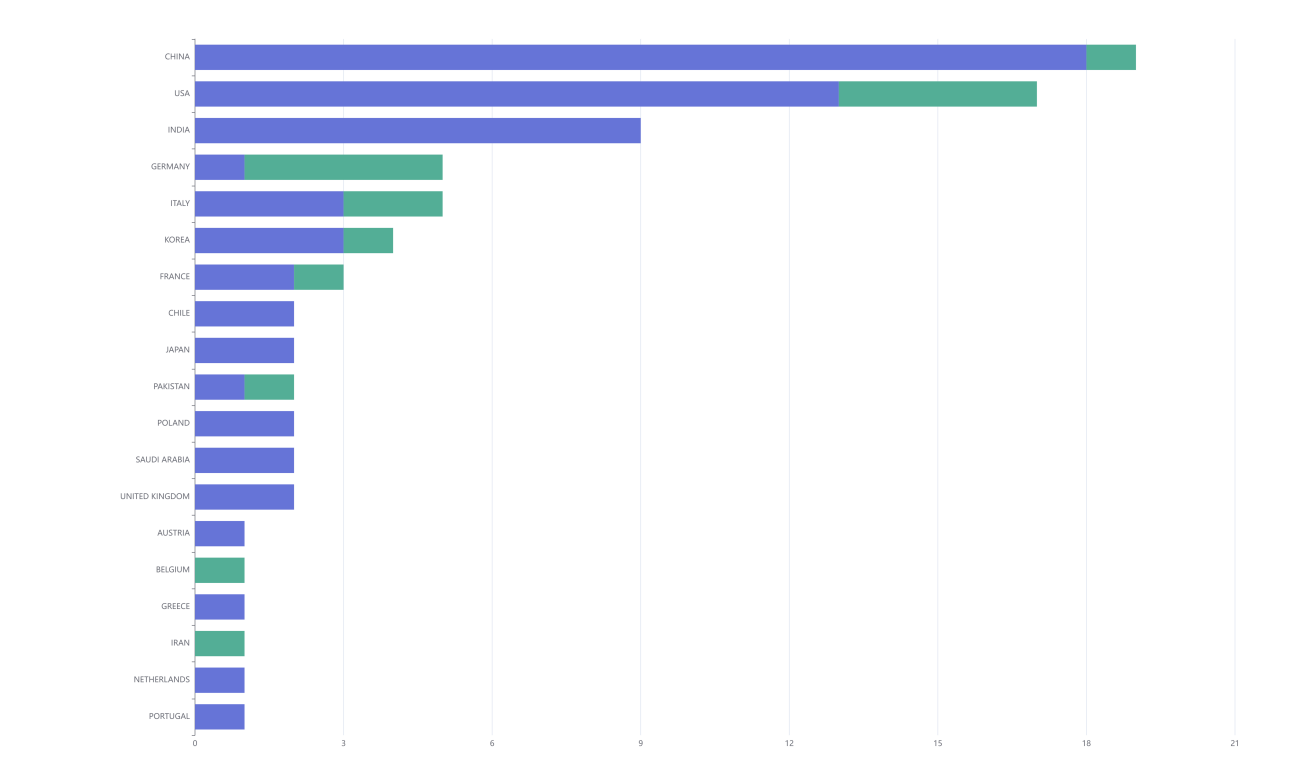
**Fig. S7** Ranking of Corresponding Authors' Countries and International Collaboration Ratios in the Field of AI and Orthopedics Cross-Disciplinary Research from January 2010 to December 2024.

**Supplementary**
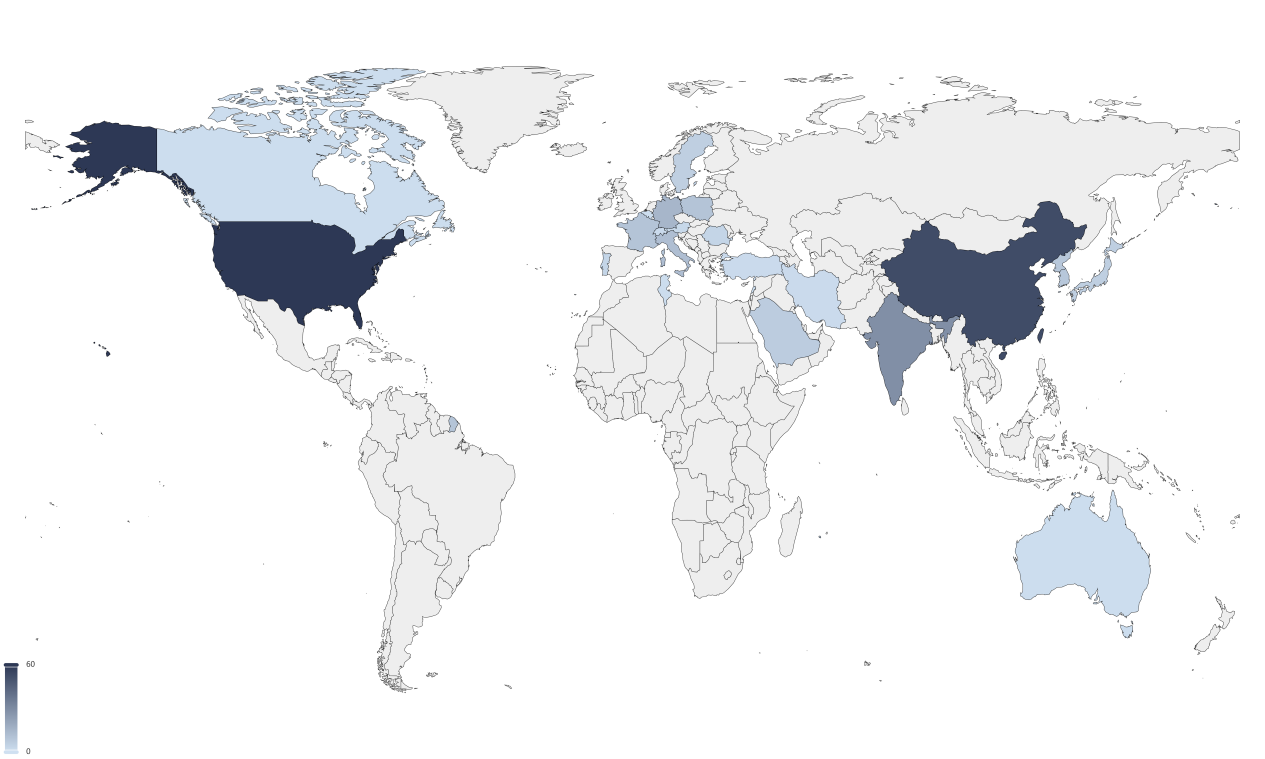
**Fig. S8** The regional distribution map of scientific output in the interdisciplinary field of AI and orthopedics across different countries from January 2010 to December 2024.

**Supplementary**
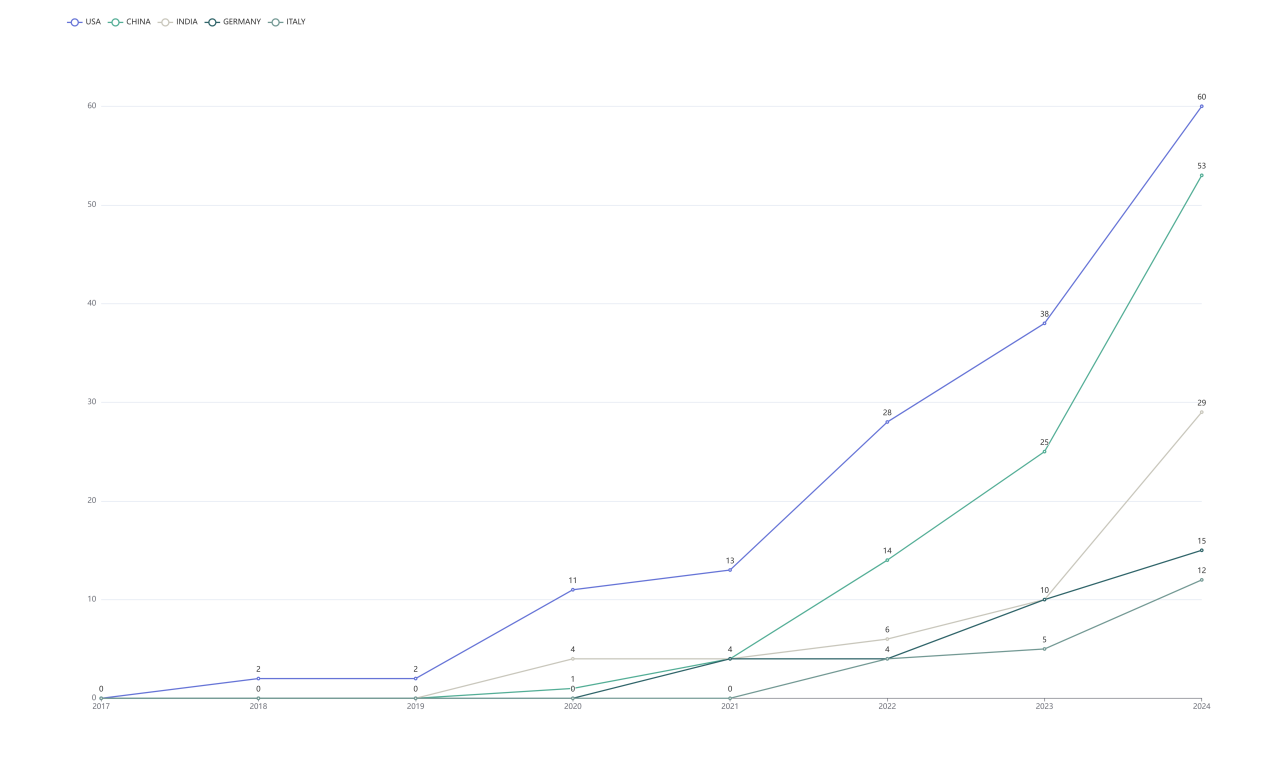
**Fig. S9** Chart of Output Over Time by Country in the Intersection of AI and Orthopedics from January 2010 to December 2024.

**Supplementary**

**Fig. S10** Citation Rankings of Different Countries in the Intersection of AI and Orthopedics from January 2010 to December 2024.

**Supplementary**
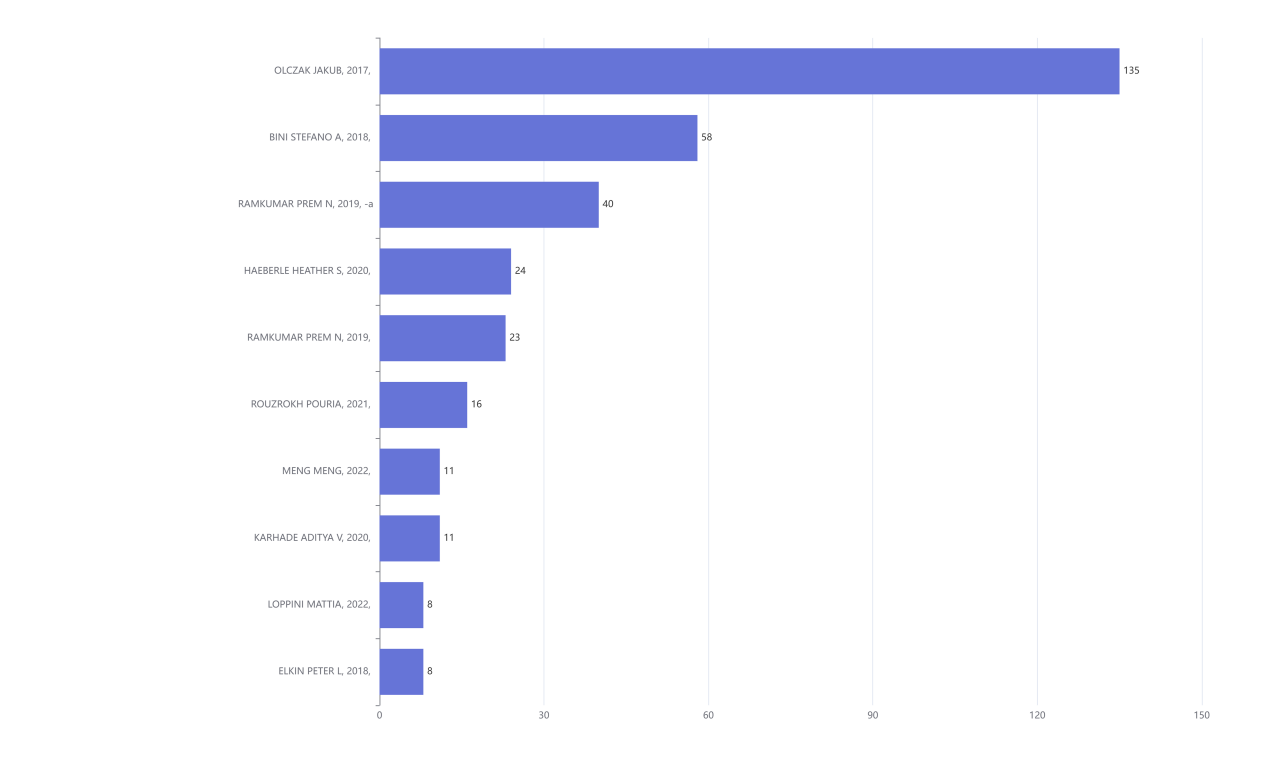
**Fig. S11** Ranking of Cited Literature in the Intersection of AI and Orthopedics from January 2010 to December 2024.

**Supplementary**
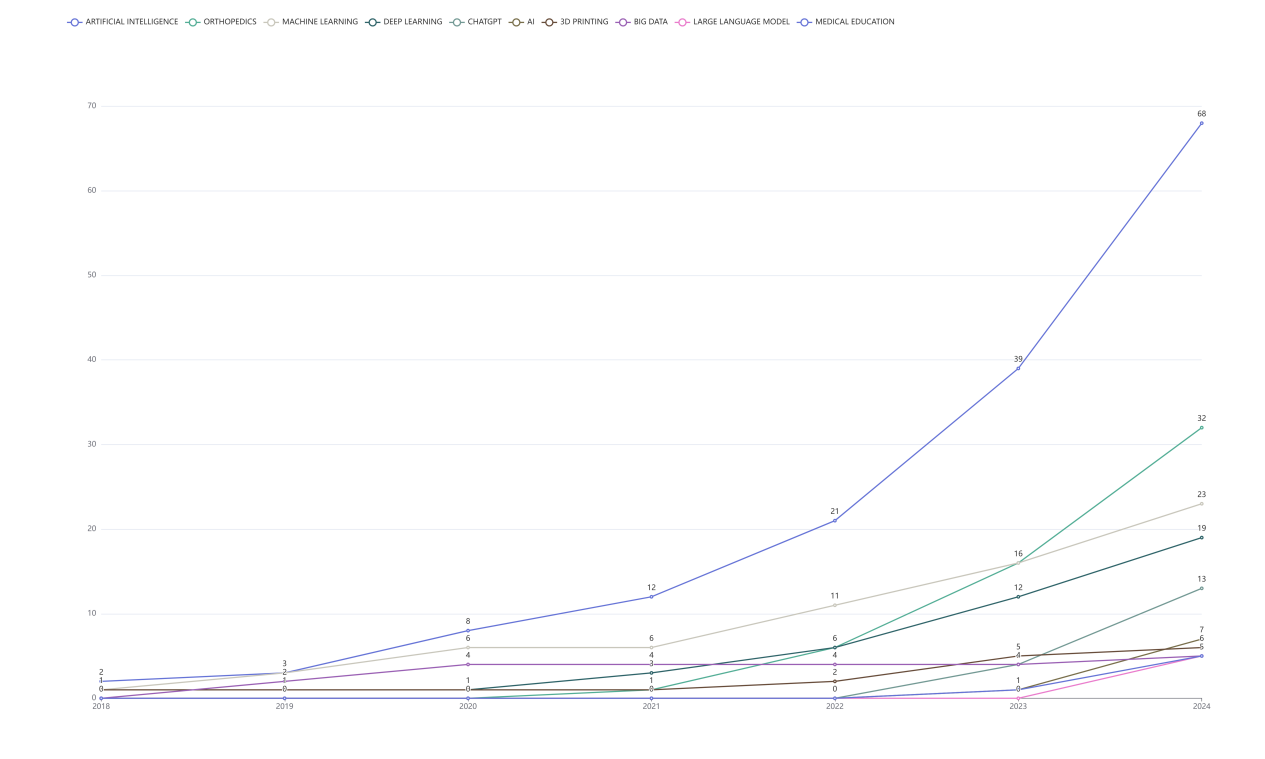
**Fig. S12** Frequency of Keywords in AI and Orthopedics Cross-Disciplinary Literature Over Time: January 2010 to December 2024.


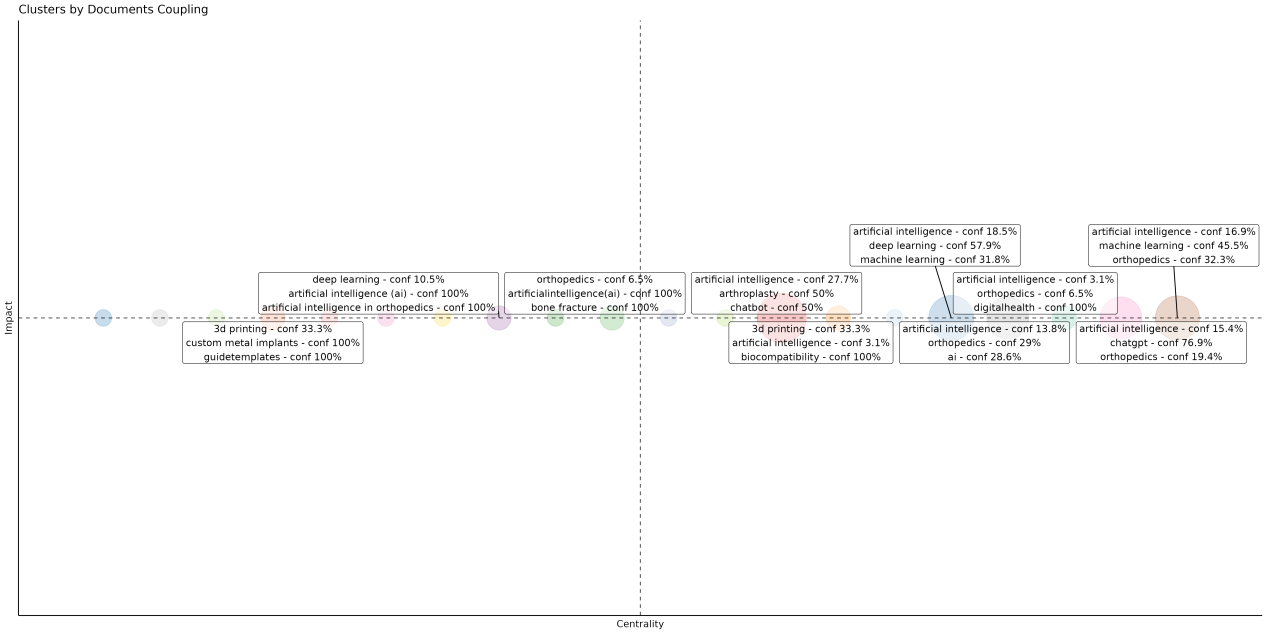


**Supplementary Fig. S13** Literature Coupling Clustering in the Intersection of AI and Orthopedics from January 2010 to December 2024.

**Supplementary**
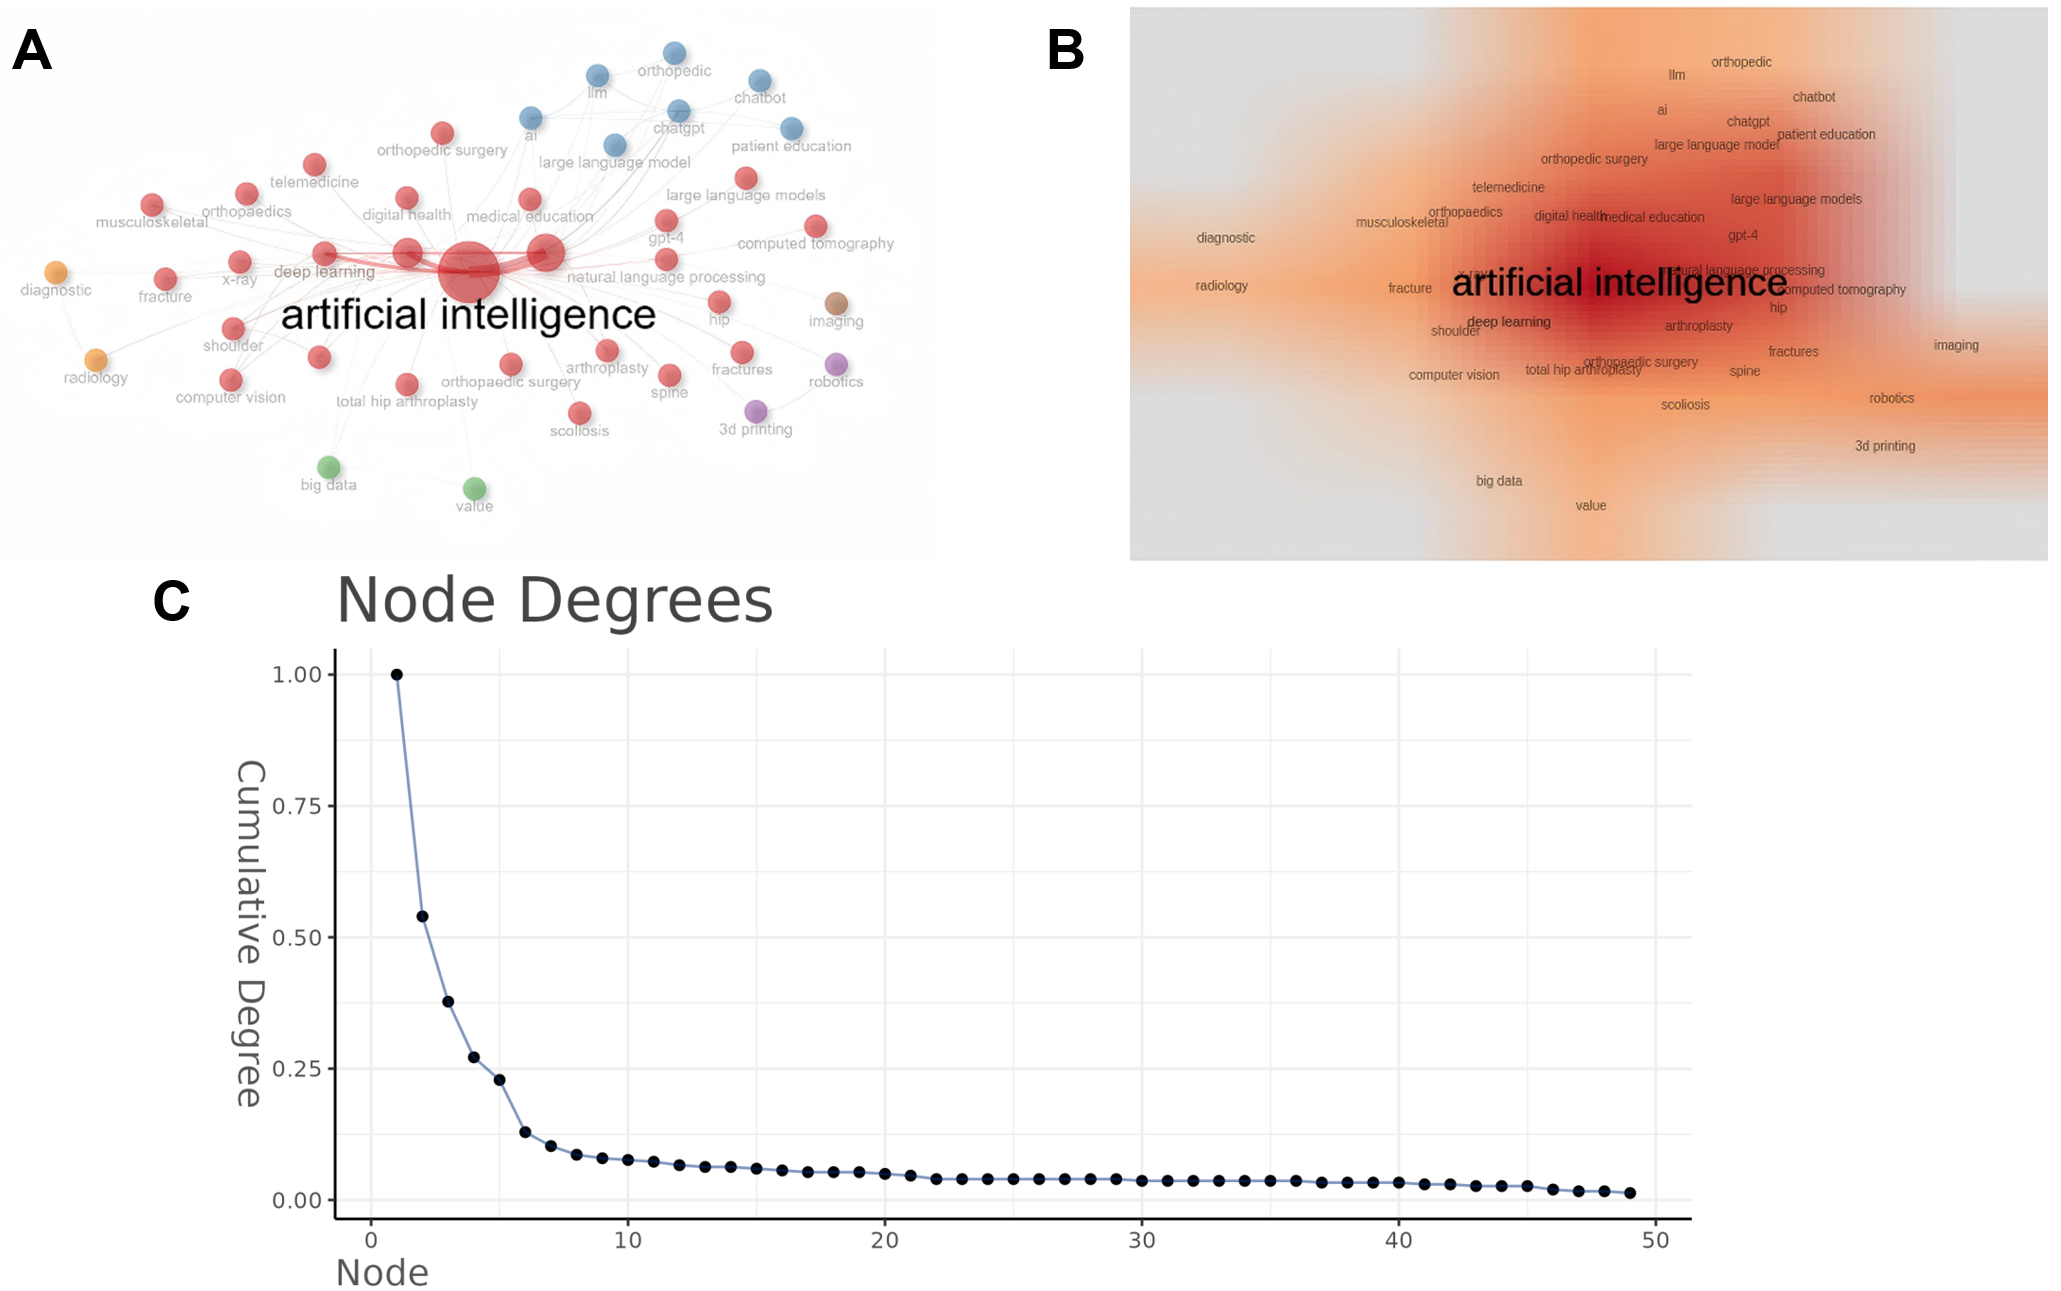
**Fig. S14** The co-occurrence network (A), density map (B), and degree distribution map (C) of keywords in the interdisciplinary field of AI and orthopedics from January 2010 to December 2024.


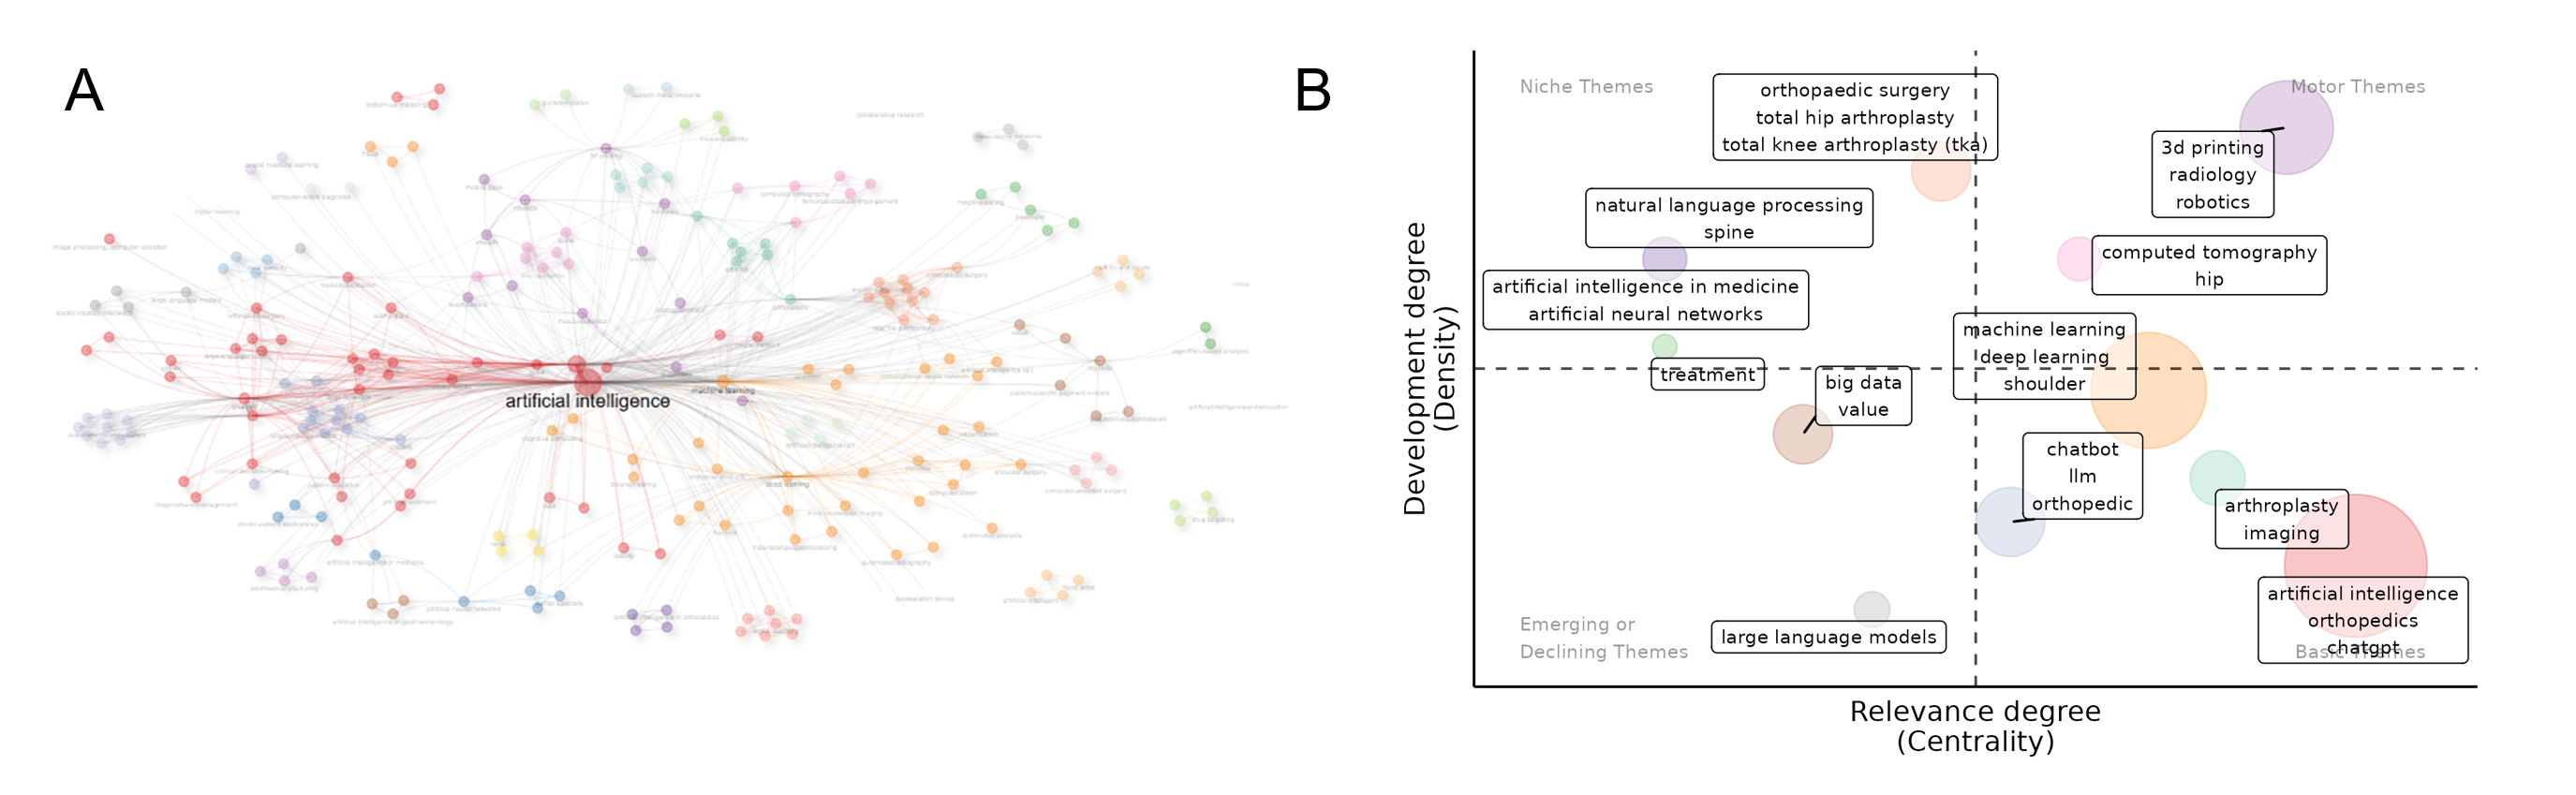


**Supplementary Fig. S15** Thematic Map of AI and Orthopedics Intersection from January 2010 to December 2024. The cluster of Artificial Intelligence held a significant central position in the network (A), and main clusters, including 3D Printing, Machine Learning, Arthroplasty, and Chatbot, were shown (B).


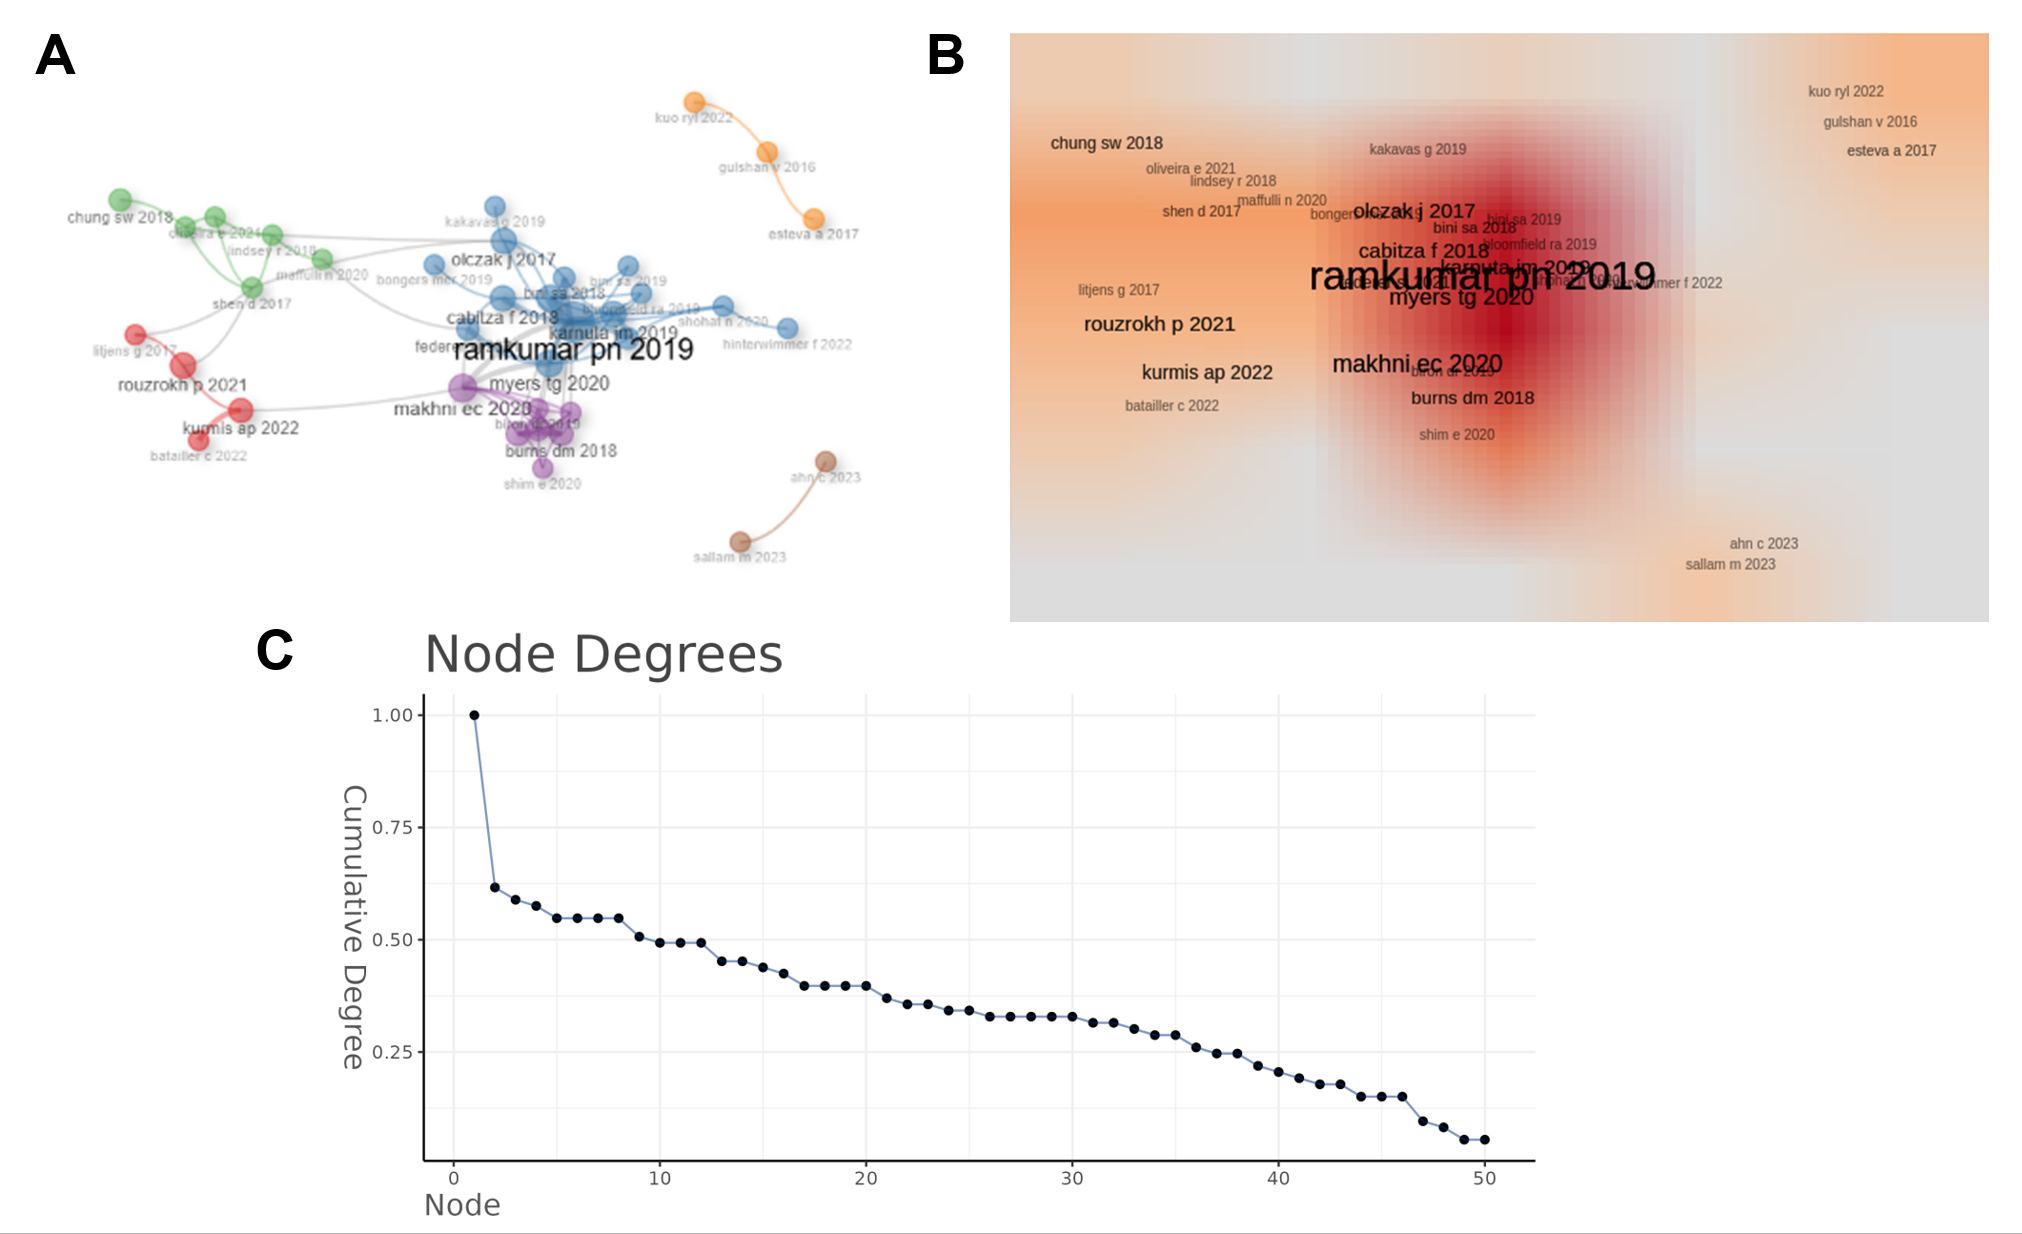


**Supplementary Fig. S16** The co-citation network analysis in the interdisciplinary field of AI and orthopedics, spanning from January 2010 to December 2024, was constructed based on the frequency of simultaneous citations of literature. The study by Ramkumar PN (2019) stood out as the most influential paper (A), and other significant contributions included works by Olczak J (2017) and Makhni EC (2020), which also held considerable importance in the field (B). The degree plot illustrated the connectivity pattern of nodes within the network, representing the number of connections each node had. For instance, terms like " Ramkumar PN (2019)" and " Olczak J (2017)" were prominently highlighted in this visualization due to their high degree values (C).


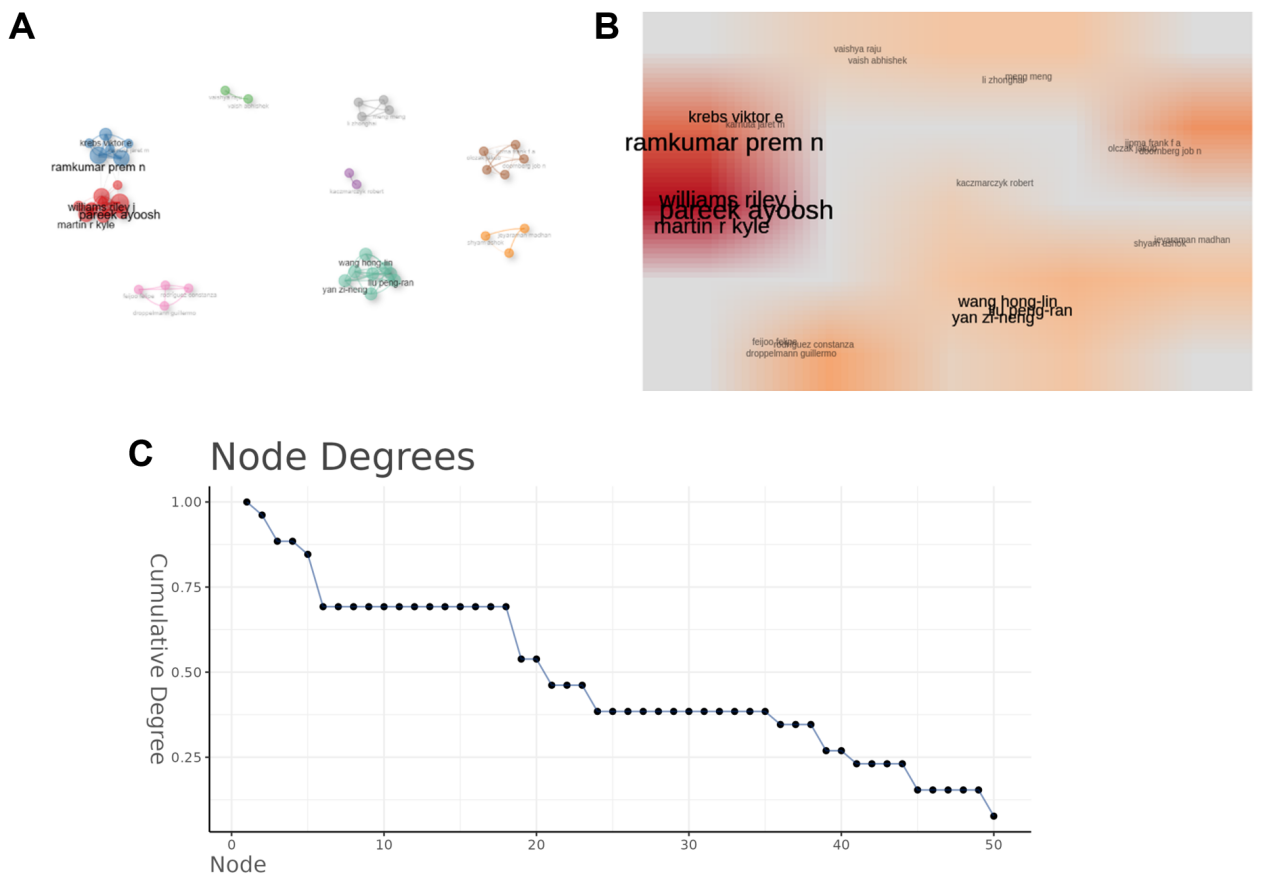
**Supplementary Fig. S17** The collaborative network of literature in the interdisciplinary field of AI and orthopedics from January 2010 to December 2024 is analyzed based on joint research and publication activities among authors, institutions, or countries. Ramkumar P.N. stood out as the most influential researcher (A), and other researchers, such as Pareek ayoosh and Martin r kyle, also occupied significant positions in the network (B). Authors like Ramkumar P.N. and Pareek ayoosh were prominently highlighted in this visualization due to their high degree values (C).

**Supplementary**
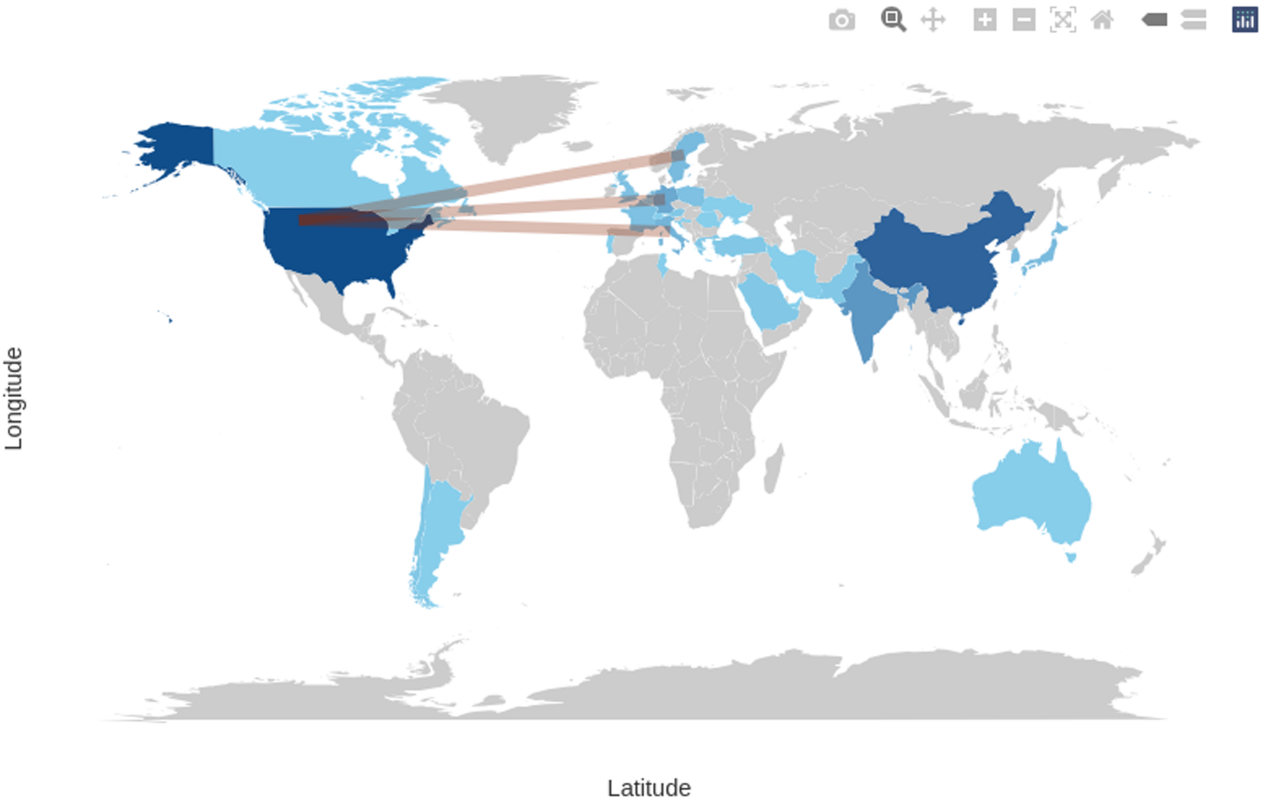
**Fig. S18** World Map of International Collaborations in the Intersection of AI and Orthopedics from January 2010 to December 2024.
